# Supplementary material for: The Perceptual Organisation of Visual Elements: Lines
Source: MDPI journal article supplement (doi:10.3390/brainsci11121585), 2021-11-30
Supplement: s1 [file s1]

Results of the analysis on the Osgood differential semantic (Experiment 3).

chi<sup>2</sup>: chi square tests for a uniform choice between the two adjectives of each pair.

OR: ratio between the maximum and the minimum odds of choosing the first member of a pair.

The last five columns report the odds of choosing the first member of a pair for each thickness value.

|                         | chi <sup>2</sup> | OR     | Thickness (mm) |       |       |       |        |
|-------------------------|------------------|--------|----------------|-------|-------|-------|--------|
|                         |                  |        | 0.50           | 1.25  | 3.10  | 7.80  | 19.50  |
| heavy/lightweight       | 538.89           | 522.82 | 0.037          | 0.161 | 0.672 | 2.394 | 19.364 |
| strong/weak             | 362.09           | 39.56  | 0.273          | 0.383 | 1.605 | 3.870 | 10.789 |
| cold/warm               | 67.68            | 3.16   | 2.500          | 1.667 | 1.517 | 0.965 | 0.792  |
| feminine/masculine      | 46.52            | 2.92   | 2.111          | 1.489 | 1.286 | 1.018 | 0.723  |
| active/passive          | 44.11            | 1.42   | 1.196          | 1.699 | 1.635 | 1.435 | 1.435  |
| dynamic/static          | 42.18            | 1.39   | 1.383          | 1.667 | 1.517 | 1.575 | 1.196  |
| bound/free              | 37.63            | 2.27   | 0.566          | 0.635 | 0.723 | 0.982 | 1.286  |
| centrifugal/centripetal | 35.32            | 1.16   | 1.333          | 1.409 | 1.517 | 1.545 | 1.333  |
| blunt/sharp             | 28.02            | 2.58   | 0.577          | 0.898 | 1.196 | 1.133 | 1.489  |
| ascending/descending    | 10.27            | 1.38   | 0.764          | 0.723 | 0.915 | 1.000 | 0.982  |
| flat/rounded            | 9.07             | 1.57   | 0.948          | 0.867 | 1.093 | 1.218 | 1.358  |
| accelerant/decelerant   | 2.23             | 1.28   | 0.898          | 1.000 | 1.000 | 1.093 | 1.154  |
| geometric/organic       | 1.34             | 1.09   | 1.074          | 1.000 | 1.055 | 1.093 | 1.093  |
| decreasing/increasing   | 0.86             | 1.15   | 1.055          | 1.036 | 1.055 | 0.915 | 1.018  |
| sour/sweet              | 0.68             | 1.13   | 1.000          | 0.948 | 1.036 | 1.074 | 0.948  |

Results of the analysis on the Osgood differential semantic (Experiment 3).

chi<sup>2</sup>: chi square tests for a uniform choice between the two adjectives of each pair.

OR: ratio between the maximum and the minimum odds of choosing the first member of a pair.

|                         | chi <sup>2</sup> | OR     | Type   |          |
|-------------------------|------------------|--------|--------|----------|
|                         |                  |        | curved | straight |
| geometric/organic       | 848.06           | 217.44 | 0.087  | 19.000   |
| flat/rounded            | 764.03           | 114.47 | 0.120  | 13.737   |
| blunt/sharp             | 486.32           | 23.66  | 4.957  | 0.210    |
| dynamic/static          | 481.14           | 25.30  | 9.769  | 0.386    |
| bound/free              | 473.58           | 22.92  | 0.143  | 3.275    |
| sour/sweet              | 432.51           | 18.34  | 0.233  | 4.283    |
| feminine/masculine      | 306.61           | 10.05  | 4.234  | 0.421    |
| cold/warm               | 289.43           | 9.03   | 0.497  | 4.490    |
| active/passive          | 163.69           | 4.24   | 3.179  | 0.750    |
| strong/weak             | 48.89            | 1.98   | 0.924  | 1.828    |
| centrifugal/centripetal | 47.16            | 1.56   | 1.786  | 1.146    |
| heavy/lightweight       | 30.36            | 1.66   | 0.623  | 1.036    |
| ascending/descending    | 5.72             | 1.07   | 0.898  | 0.842    |
| accelerant/decelerant   | 1.21             | 1.13   | 1.090  | 0.965    |
| decreasing/increasing   | 0.76             | 1.11   | 0.965  | 1.066    |

Results of the analysis on the Osgood differential semantic (Experiment 3).

chi<sup>2</sup>: chi square tests for a uniform choice between the two adjectives of each pair.

OR: ratio between the maximum and the minimum odds of choosing the first member of a pair.

The last four columns report the odds of choosing the first member of a pair for the four categories of the variable colour/background.

|                         | chi <sup>2</sup> | OR   | Colour/Background |                   |                   |                  |
|-------------------------|------------------|------|-------------------|-------------------|-------------------|------------------|
|                         |                  |      | White<br>on Grey  | White<br>on Black | Black<br>on White | Black<br>on Grey |
| active/passive          | 42.11            | 1.23 | 1.353             | 1.353             | 1.523             | 1.667            |
| dynamic/static          | 40.66            | 1.25 | 1.373             | 1.353             | 1.435             | 1.692            |
| centrifugal/centripetal | 36.60            | 1.27 | 1.258             | 1.353             | 1.593             | 1.523            |
| cold/warm               | 26.94            | 1.23 | 1.456             | 1.353             | 1.435             | 1.188            |
| strong/weak             | 22.04            | 1.36 | 1.154             | 1.171             | 1.569             | 1.314            |
| bound/free              | 14.96            | 1.24 | 0.806             | 0.905             | 0.783             | 0.728            |
| feminine/masculine      | 14.93            | 1.30 | 1.276             | 1.188             | 1.090             | 1.414            |
| ascending/descending    | 14.27            | 1.50 | 1.029             | 0.697             | 1.044             | 0.761            |
| heavy/lightweight       | 14.09            | 1.17 | 0.739             | 0.867             | 0.854             | 0.772            |
| decreasing/increasing   | 9.66             | 1.68 | 0.761             | 1.276             | 1.014             | 1.074            |
| accelerant/decelerant   | 3.81             | 1.37 | 1.044             | 0.854             | 1.171             | 1.059            |
| sour/sweet              | 2.17             | 1.26 | 1.059             | 0.867             | 1.090             | 1.000            |
| flat/rounded            | 1.86             | 1.04 | 1.105             | 1.059             | 1.059             | 1.105            |
| geometric/organic       | 1.27             | 1.07 | 1.090             | 1.090             | 1.014             | 1.059            |
| blunt/sharp             | 0.53             | 1.11 | 1.074             | 0.972             | 1.029             | 0.972            |

Results of the analysis on the Osgood differential semantic (Experiment 3).

chi<sup>2</sup>: chi square tests for a uniform choice between the two adjectives of each pair.

OR: ratio between the maximum and the minimum odds of choosing the first member of a pair.

The last four columns report the odds of choosing the first member of a pair for the four categories of the variable orientation.

|                         | chi <sup>2</sup> | OR    | Orientation |          |                      |                           |
|-------------------------|------------------|-------|-------------|----------|----------------------|---------------------------|
|                         |                  |       | Horizontal  | Vertical | Harmonic<br>Diagonal | Disharmonious<br>Diagonal |
| ascending/descending    | 250.84           | 21.43 | 1.119       | 0.669    | 0.186                | 3.982                     |
| decreasing/increasing   | 227.20           | 18.64 | 0.832       | 1.165    | 4.263                | 0.229                     |
| accelerant/decelerant   | 129.01           | 7.62  | 1.135       | 0.819    | 0.422                | 3.215                     |
| centrifugal/centripetal | 90.17            | 3.17  | 2.054       | 1.079    | 0.807                | 2.558                     |
| active/passive          | 55.36            | 1.86  | 1.219       | 1.220    | 1.419                | 2.262                     |
| dynamic/static          | 41.43            | 1.33  | 1.290       | 1.382    | 1.479                | 1.713                     |
| cold/warm               | 25.62            | 1.10  | 1.407       | 1.278    | 1.326                | 1.404                     |
| strong/weak             | 25.15            | 1.59  | 1.254       | 1.063    | 1.239                | 1.686                     |
| bound/free              | 20.01            | 1.52  | 0.986       | 0.735    | 0.863                | 0.651                     |
| feminine/masculine      | 17.71            | 1.45  | 1.559       | 1.202    | 1.158                | 1.076                     |
| heavy/lightweight       | 14.47            | 1.22  | 0.786       | 0.782    | 0.911                | 0.745                     |
| blunt/sharp             | 5.45             | 1.41  | 1.058       | 1.259    | 0.899                | 0.890                     |
| flat/rounded            | 5.36             | 1.35  | 1.058       | 0.899    | 1.174                | 1.210                     |
| geometric/organic       | 4.73             | 1.32  | 0.945       | 0.955    | 1.128                | 1.246                     |
| sour/sweet              | 1.43             | 1.21  | 0.919       | 1.113    | 0.961                | 1.030                     |
