# Supplementary material for: The Perceptual Organisation of Visual Elements: Lines
Source: MDPI journal article supplement (doi:10.3390/brainsci11121585), 2021-11-30
Supplement: s1 [file s1]

Results of the analysis on the Osgood differential semantic (Experiment 4).

chi<sup>2</sup>: chi square tests for a uniform choice between the two adjectives of each pair.

OR: ratio between the maximum and the minimum odds of choosing the first member of a pair.

The last five columns report the odds of choosing the first member of a pair for each thickness value.

|                         | chi <sup>2</sup> | OR     | Thickness (mm) |       |       |       |       |
|-------------------------|------------------|--------|----------------|-------|-------|-------|-------|
|                         |                  |        | 0.50           | 1.25  | 3.10  | 7.80  | 19.50 |
| heavy/lightweight       | 462.74           | 248.83 | 0.031          | 0.111 | 0.471 | 1.703 | 7.696 |
| strong/weak             | 234.96           | 27.15  | 0.258          | 0.399 | 0.942 | 1.778 | 7.000 |
| silent/sonorous         | 102.68           | 7.22   | 3.167          | 1.632 | 1.439 | 1.062 | 0.439 |
| cold/warm               | 80.62            | 2.27   | 2.774          | 1.817 | 1.667 | 1.381 | 1.222 |
| frigid/sensual          | 23.18            | 1.23   | 1.469          | 1.222 | 1.469 | 1.381 | 1.198 |
| fluffy/rough            | 22.74            | 1.51   | 1.083          | 1.198 | 1.500 | 1.174 | 1.632 |
| feminine/masculine      | 13.62            | 1.69   | 1.174          | 1.128 | 1.020 | 0.724 | 0.695 |
| dynamic/static          | 12.84            | 1.50   | 1.198          | 1.174 | 1.353 | 1.381 | 0.923 |
| centrifugal/centripetal | 9.42             | 1.69   | 0.835          | 1.041 | 1.198 | 1.410 | 1.083 |
| consonant/dissonant     | 8.92             | 1.59   | 1.041          | 1.273 | 1.353 | 0.942 | 0.852 |
| agitated/calm           | 7.48             | 1.62   | 1.509          | 1.197 | 1.120 | 1.024 | 0.933 |
| sour/sweet              | 7.40             | 1.59   | 1.410          | 1.083 | 0.961 | 0.887 | 0.905 |
| flat/rounded            | 6.44             | 1.15   | 1.247          | 1.083 | 1.151 | 1.222 | 1.128 |
| hard/soft               | 3.10             | 1.15   | 1.151          | 1.174 | 1.020 | 1.105 | 1.083 |
| accelerant/decelerant   | 2.18             | 1.25   | 0.887          | 0.961 | 0.961 | 0.869 | 1.083 |

Results of the analysis on the Osgood differential semantic (Experiment 4).

chi<sup>2</sup>: chi square tests for a uniform choice between the two adjectives of each pair.

OR: ratio between the maximum and the minimum odds of choosing the first member of a pair.

|                         | chi <sup>2</sup> | OR     | Type   |          |
|-------------------------|------------------|--------|--------|----------|
|                         |                  |        | curved | straight |
| flat/rounded            | 671.63           | 117.24 | 0.149  | 17.519   |
| hard/soft               | 652.14           | 92.76  | 0.139  | 12.889   |
| dynamic/static          | 543.57           | 46.69  | 10.111 | 0.217    |
| fluffy/rough            | 439.40           | 25.62  | 8.091  | 0.316    |
| frigid/sensual          | 378.92           | 18.05  | 0.377  | 6.812    |
| feminine/masculine      | 218.60           | 7.57   | 2.497  | 0.330    |
| sour/sweet              | 193.86           | 6.62   | 0.404  | 2.676    |
| cold/warm               | 88.23            | 1.95   | 1.222  | 2.378    |
| silent/sonorous         | 69.15            | 2.66   | 0.786  | 2.086    |
| heavy/lightweight       | 49.64            | 1.30   | 0.567  | 0.736    |
| strong/weak             | 44.96            | 2.37   | 0.645  | 1.525    |
| agitated/calm           | 41.26            | 2.70   | 1.498  | 0.554    |
| centrifugal/centripetal | 20.07            | 1.72   | 1.439  | 0.838    |
| accelerant/decelerant   | 4.04             | 1.26   | 1.066  | 0.845    |
| consonant/dissonant     | 2.32             | 1.14   | 1.146  | 1.008    |

Results of the analysis on the Osgood differential semantic (Experiment 4).

chi<sup>2</sup>: chi square tests for a uniform choice between the two adjectives of each pair.

OR: ratio between the maximum and the minimum odds of choosing the first member of a pair.

The last four columns report the odds of choosing the first member of a pair for the four categories of the variable colour.

|                         | chi <sup>2</sup> | OR    | Colour     |           |        |       |
|-------------------------|------------------|-------|------------|-----------|--------|-------|
|                         |                  |       | Light Blue | Dark Blue | Yellow | Brown |
| cold/warm               | 339.76           | 29.18 | 9.417      | 4.952     | 0.323  | 1.119 |
| silent/sonorous         | 85.79            | 4.05  | 1.976      | 1.747     | 0.488  | 1.525 |
| agitated/calm           | 78.87            | 6.27  | 4.083      | 2.214     | 0.651  | 0.890 |
| heavy/lightweight       | 62.00            | 2.13  | 0.420      | 0.712     | 0.634  | 0.894 |
| frigid/sensual          | 48.91            | 2.52  | 2.012      | 1.604     | 0.799  | 1.294 |
| fluffy/rough            | 22.48            | 1.41  | 1.551      | 1.101     | 1.475  | 1.137 |
| sour/sweet              | 13.92            | 1.91  | 0.969      | 1.404     | 1.137  | 0.736 |
| strong/weak             | 12.99            | 1.85  | 0.786      | 0.894     | 1.451  | 0.953 |
| dynamic/static          | 10.27            | 1.32  | 1.232      | 1.137     | 1.381  | 1.049 |
| feminine/masculine      | 7.63             | 1.50  | 1.033      | 0.748     | 1.119  | 0.852 |
| consonant/dissonant     | 6.88             | 1.49  | 1.252      | 1.119     | 1.137  | 0.838 |
| flat/rounded            | 6.50             | 1.16  | 1.273      | 1.155     | 1.101  | 1.137 |
| hard/soft               | 4.46             | 1.25  | 0.953      | 1.174     | 1.119  | 1.193 |
| centrifugal/centripetal | 4.37             | 1.25  | 1.193      | 0.969     | 1.033  | 1.212 |
| accelerant/decelerant   | 3.38             | 1.29  | 0.880      | 0.838     | 1.083  | 1.016 |

Results of the analysis on the Osgood differential semantic (Experiment 4).

chi<sup>2</sup>: chi square tests for a uniform choice between the two adjectives of each pair.

OR: ratio between the maximum and the minimum odds of choosing the first member of a pair.

The last four columns report the odds of choosing the first member of a pair for the three categories of the variable background.

|                         | chi <sup>2</sup> | OR   | Background |       |       |
|-------------------------|------------------|------|------------|-------|-------|
|                         |                  |      | White      | Grey  | Black |
| cold/warm               | 77.73            | 1.75 | 2.364      | 1.478 | 1.353 |
| heavy/lightweight       | 52.60            | 1.53 | 0.519      | 0.795 | 0.682 |
| frigid/sensual          | 22.97            | 1.23 | 1.483      | 1.205 | 1.323 |
| fluffy/rough            | 18.86            | 1.22 | 1.222      | 1.205 | 1.466 |
| silent/sonorous         | 18.34            | 1.39 | 1.093      | 1.205 | 1.517 |
| centrifugal/centripetal | 10.86            | 1.51 | 0.856      | 1.222 | 1.293 |
| dynamic/static          | 10.07            | 1.25 | 1.081      | 1.154 | 1.353 |
| feminine/masculine      | 7.18             | 1.42 | 1.130      | 0.795 | 0.856 |
| hard/soft               | 6.45             | 1.37 | 1.118      | 1.314 | 0.957 |
| agitated/calm           | 6.26             | 1.36 | 1.290      | 1.204 | 0.948 |
| flat/rounded            | 5.97             | 1.06 | 1.209      | 1.137 | 1.143 |
| consonant/dissonant     | 3.70             | 1.26 | 1.022      | 0.972 | 1.222 |
| accelerant/decelerant   | 1.95             | 1.20 | 1.022      | 0.854 | 0.957 |
| strong/weak             | 1.85             | 1.20 | 1.057      | 1.059 | 0.885 |
| sour/sweet              | 0.87             | 1.12 | 0.967      | 1.059 | 1.081 |

Results of the analysis on the Osgood differential semantic (Experiment 4).

chi<sup>2</sup>: chi square tests for a uniform choice between the two adjectives of each pair.

OR: ratio between the maximum and the minimum odds of choosing the first member of a pair.

The last four columns report the odds of choosing the first member of a pair for the four categories of the variable orientation.

|                         | chi <sup>2</sup> | OR   | Orientation |          |                      |                           |
|-------------------------|------------------|------|-------------|----------|----------------------|---------------------------|
|                         |                  |      | Horizontal  | Vertical | Harmonic<br>Diagonal | Disharmonious<br>Diagonal |
| accelerant/decelerant   | 109.18           | 6.17 | 1.185       | 0.626    | 0.389                | 2.398                     |
| cold/warm               | 67.35            | 1.35 | 1.408       | 1.779    | 1.641                | 1.907                     |
| heavy/lightweight       | 46.17            | 1.11 | 0.639       | 0.660    | 0.609                | 0.679                     |
| frigid/sensual          | 26.98            | 1.52 | 1.291       | 1.060    | 1.613                | 1.452                     |
| fluffy/rough            | 21.41            | 1.36 | 1.538       | 1.464    | 1.132                | 1.153                     |
| silent/sonorous         | 17.16            | 1.38 | 1.126       | 1.255    | 1.558                | 1.169                     |
| dynamic/static          | 13.09            | 1.43 | 0.967       | 1.096    | 1.382                | 1.350                     |
| centrifugal/centripetal | 11.53            | 1.54 | 1.360       | 0.882    | 0.913                | 1.293                     |
| consonant/dissonant     | 10.95            | 1.64 | 1.511       | 1.078    | 0.929                | 0.918                     |
| hard/soft               | 7.94             | 1.37 | 0.950       | 0.943    | 1.292                | 1.256                     |
| flat/rounded            | 7.41             | 1.24 | 1.226       | 1.043    | 1.292                | 1.120                     |
| feminine/masculine      | 5.13             | 1.35 | 1.088       | 0.853    | 1.008                | 0.808                     |
| agitated/calm           | 4.43             | 1.29 | 0.959       | 1.140    | 1.163                | 1.237                     |
| sour/sweet              | 3.26             | 1.32 | 0.858       | 1.134    | 1.025                | 1.120                     |
| strong/weak             | 2.61             | 1.31 | 1.034       | 0.943    | 1.150                | 0.880                     |
